# Supplementary material
Source: PubMed Central journal article supplement (PMC1992440)

# Supplementary Figure 1

Labeled vs Unlabeled (No Normalization)

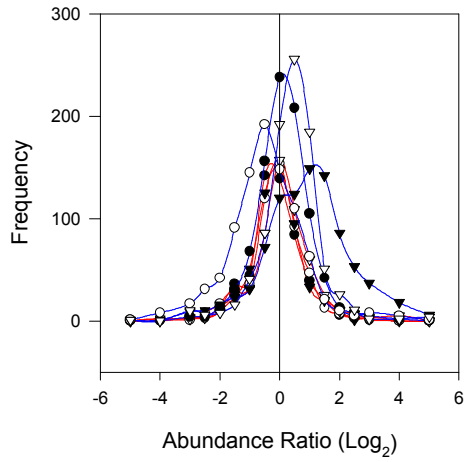

- Labeled ( $^{14}\text{N}/^{15}\text{N}$ ) replicates of *S. oneidensis* oxic and sub-oxic cell cultures.
- Unlabeled replicates of *S. oneidensis* oxic and sub-oxic cell cultures.

Labeled vs Unlabeled (Central Tendency Normalization)

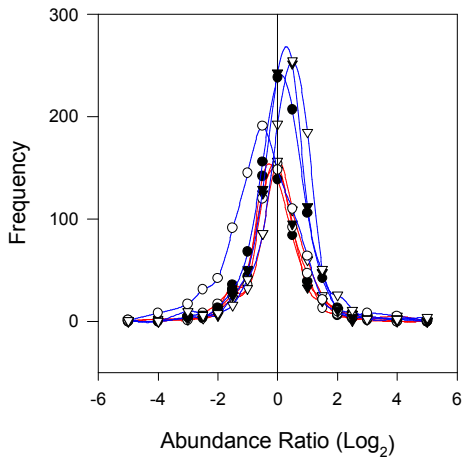

Labeled vs Unlabeled (Linear Regression Normalization)

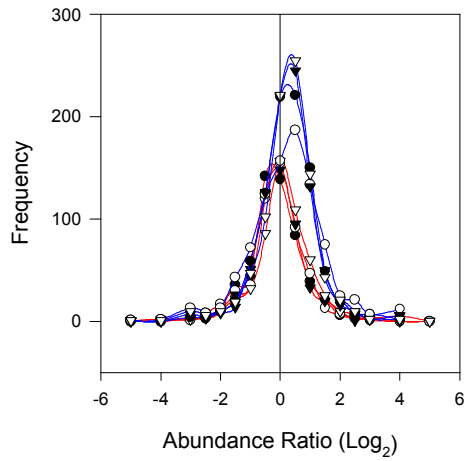

Labeled vs Unlabeled (Local Regression Normalization)

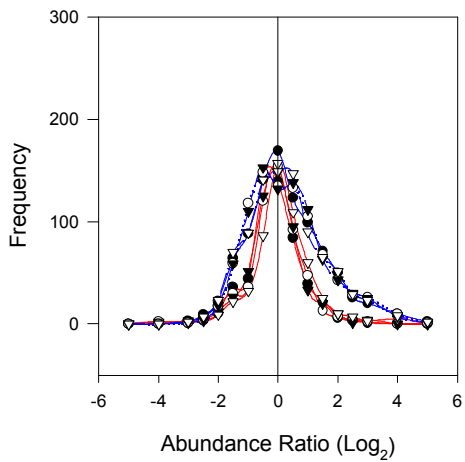

Labeled vs Unlabeled (Quantile Normalization)

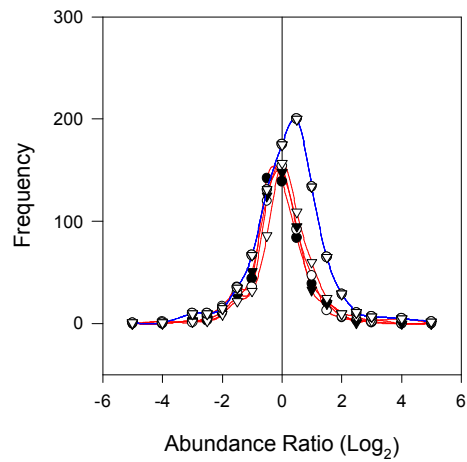

Supplement: NIHMS15642-supplement-supplement_1.pdf [file NIHMS15642-supplement-supplement_1.pdf]
